# Supplementary material for: Comprehensive comparison of different parts of Paeonia ostii, a food-medicine plant, based on untargeted metabolomics, quantitative analysis, and bioactivity analysis
Source: Front Plant Sci. 2023 Aug 29;14:1243724. doi: 10.3389/fpls.2023.1243724 (PMC10497777; doi:10.3389/fpls.2023.1243724)
Supplement: Supplementary file 2 [file DataSheet_2.xlsx]

## Sheet: Sheet1
	Compound	Retention time (min)	m/z	Adducts/Deprotonated ions	Fragmentation ions	Formula	Score	Fragment Score	Mass Error (ppm)	Isotope Similarity	Theoretical Isotope Distribution	Description	Class	Method
1	0.76_377.0849m/z	0.755783	377.085	M+FA-H	341，195	C17H16O7	36.8	1.15	-8.89849	92.4741	100 - 18.8 - 3.11 - 0.364	(3R,4S)-3-methyl-3,4-dihydro-5,6,7-trihydroxy-4-(30-methoxy-40-hydroxyphenyl)-1H-[2]-benzopyran-1-one	Others	Library match
2	0.78_327.0923m/z	0.777683	327.092	M-H	223，195，165	C11H20O11	55.8	92.4	-2.942	89.874	100 - 12.5 - 2.98 - 0.308	Sucrose	Others	Library match
3	1.13_332.0738n	1.1345	331.066	M-H, 2M-H	292，169	C13H16O10	56.1	86.6	-1.74534	96.2259	100 - 14.6 - 3.05 - 0.341	1-O-Galloyl-β-D-hexose	Tannis	Library match
4	1.15_493.1194m/z	1.14545	493.119	M-H	331，191	C19H26O15	57.3	97	-0.918132	90.6153	100 - 21.4 - 5.27 - 0.8 - 0.118	6'-O-Galloylsucrose	Tannis	Library match
	1.15_493.1194m/z	1.14545	493.119	M-H	331，191	C19H26O15	57.3	97	-0.918132	90.6153	100 - 21.4 - 5.27 - 0.8 - 0.118	6-O-Galloylsucrose	Tannis	Library match
5	1.19_373.1135m/z	1.19472	373.114	M+FA-H	331，292	C15H20O8	58	95.7	-1.53722	96.2642	100 - 16.8 - 2.96 - 0.339	3-O-β-D-glucopyranosyl-4-methoxyacetophenone	Phenols	Library match
	1.19_373.1135m/z	1.19472	373.114	M+FA-H	331，271，169	C15H20O8	58	95.7	-1.53722	96.2642	100 - 16.8 - 2.96 - 0.339	Glucopaeonol	Phenols	Library match
6	1.32_376.1362n	1.31563	375.129	M-H, M+FA-H, 2M-H	341，325，169	C16H24O10	48.8	48	-2.10746	98.364	100 - 18 - 3.57 - 0.449	8-Debenzoylpaeoniflorin	Monoterpene glycosides	Library match
7	1.39_331.0664m/z	1.3868	331.066	M-H	271，169，125	C13H16O10	56.5	86.3	-1.88615	98.483	100 - 14.6 - 3.05 - 0.341	1-O-Galloyl-β-D-hexose	Tannis	Library match
8	1.42_169.0137m/z	1.42	196.014	M-H	-	C7H6O5	-	-	0	-	-	Gallic acid	Phenols	standard compound
9	1.47_360.1413n	1.47488	359.134	M-H, M+FA-H, 2M-H	315，197	C16H24O9	48.6	48.2	-2.03318	97.1478	100 - 17.9 - 3.36 - 0.411	1-O-β-D-Glucopyranosylpaeonisuffrone	Monoterpene glycosides	Library match
10	1.52_345.1547m/z	1.52415	345.155	M-H	-	C16H26O8	53.6	83.3	-2.2144	87.2468	100 - 17.9 - 3.15 - 0.373	paeonirockosides A	Others	Library match
11	1.55_213.0764m/z	1.55152	213.076	M-H	-	C10H14O5	56.9	96.7	-2.09948	90.2751	100 - 11.2 - 1.59 - 0.131	9-Hydroxypaeonilactone A	Monoterpene glycosides	Library match
	1.55_213.0764m/z	1.55152	213.076	M-H	-	C10H14O5	54.7	85.6	-2.09948	90.2751	100 - 11.2 - 1.59 - 0.131	Paeonisuffral	Monoterpene glycosides	Library match
12	1.57_389.1444m/z	1.57342	389.144	M+FA-H	315，279，169	C16H24O8	55	91.4	-2.68421	86.9107	100 - 17.9 - 3.15 - 0.373	paeonirockosides b	Monoterpene glycosides	Library match
13	1.68_435.1492m/z	1.67792	435.149	M+FA-H	434，341，293	C17H26O10	55.9	93.8	-4.2068	90.5356	100 - 19.1 - 3.77 - 0.488	8-O-Debenzoylpaeonidanin	Monoterpene glycosides	Library match
14	1.94_197.0813m/z	1.94167	197.081	M-H	174，112	C10H14O4	43.9	27.7	-3.0227	95.4492	100 - 11.1 - 1.38 - 0.108	Paeonilactone A	Monoterpene glycosides	Library match
17	2.01_314.0996n	2.00735	313.092	M-H, 2M-H	299，229，151	C14H18O8	39.5	1.66	-1.78437	98.0999	100 - 15.7 - 2.79 - 0.308	Methylarbutin	Phenols	Library match
15	2.01_287.0768m/z	2.00735	287.077	M-H	232	C12H16O8	42.7	19.5	-1.49891	95.6541	100 - 13.5 - 2.48 - 0.253	1,2,6-Benzenetriol-1-O-α-D- hexoside or Paeoniphenoside	Phenols	Library match
16	2.01_151.0396m/z	2.00735	151.04	M+FA-H	129	C7H6O	50	57.8	-4.10167	97.0186	100 - 7.68 - 0.459	Benzaldehyde	Phenols	Library match
18	2.03_299.0767m/z	2.02925	299.077	M-H	239，197，146	C13H16O8	53.2	70.3	-1.76034	97.8253	100 - 14.5 - 2.63 - 0.279	1-O-(4-hydroxybenzoyl)-β-D-galactopyranoside	Phenols	Library match
19	2.05_197.0449m/z	2.04567	197.045	M-H	183，151，112	C9H10O5	47.4	42.8	-3.02079	97.5131	100 - 10 - 1.48 - 0.115	Syringic acid	Phenols	Library match
20	2.19_527.1400m/z	2.18848	527.14	M-H	497，403，333	C23H28O14	56.5	87.8	-1.14086	95.9823	100 - 25.7 - 6.05 - 0.989 - 0.144	6'-O-Galloyldesbenzoylalbiflorin	Monoterpene glycosides	Library match
	2.19_527.1400m/z	2.18848	527.14	M-H	453，341，265	C23H28O14	53.6	73.4	-1.14086	95.9823	100 - 25.7 - 6.05 - 0.989 - 0.144	8-O-Galloyldesbenzoylpaeoniflorin	Monoterpene glycosides	Library match
	2.19_527.1400m/z	2.18848	527.14	M-H	477，333	C23H28O14	56.5	87.8	-1.14086	95.9823	100 - 25.7 - 6.05 - 0.989 - 0.144	6'-O-Galloyldesbenzoylpaeoniflorin	Monoterpene glycosides	Library match
21	2.30_633.0726m/z	2.30393	633.073	M-H	-	C27H22O18	54.9	89.6	-1.12973	86.189	100 - 30.1 - 8.08 - 1.52 - 0.254	Pterocaryanin B	Tannis	Library match
22	2.34_783.0678m/z	2.33678	783.068	M-H	635，483，413	C34H24O22	51.1	58.7	-1.11208	98.1814	100 - 37.9 - 11.5 - 2.54 - 0.485	Casuariin	Tannis	Library match
	2.34_783.0678m/z	2.33678	783.068	M-H	635，483	C34H24O22	51	58	-1.11208	98.1814	100 - 37.9 - 11.5 - 2.54 - 0.485	Pedunculagin	Tannis	Library match
23	2.39_577.1345m/z	2.38605	577.135	M-H	483，425，389，343	C30H26O12	50.5	55.2	-1.10537	98.5513	100 - 33.2 - 7.8 - 1.37 - 0.201	Procyanidin B-7	Tannis	Library match
	2.39_577.1345m/z	2.38605	577.135	M-H	483，425，343	C30H26O12	50.5	55.2	-1.10537	98.5513	100 - 33.2 - 7.8 - 1.37 - 0.201	Procyanidin B-3	Tannis	Library match
24	2.41_151.0396m/z	2.41342	151.04	M-H	125，95	C8H8O3	57.2	92.5	-2.9903	97.0756	100 - 8.86 - 0.962	Me salicylate	Phenols	Library match
	2.41_151.0396m/z	2.41342	151.04	M-H	130	C8H8O3	57.2	92.5	-2.9903	97.0756	100 - 8.86 - 0.962	Resacetophenone	Phenols	Library match
	2.41_151.0396m/z	2.41342	151.04	M-H	146，101	C8H8O3	57.2	92.5	-2.9903	97.0756	100 - 8.86 - 0.962	2,5-Dihydroxy-4-methoxy acetophenone	Phenols	Library match
25	2.43_344.1464n	2.42983	343.139	M-H, 2M-H	313，209	C16H24O8	48.9	50.4	-2.06035	96.5017	100 - 17.9 - 3.15 - 0.373	Mudanpioside G	Monoterpene glycosides	Library match
26	2.45_199.0970m/z	2.45223	199.097	M-H	161，112	C10H16O4	41.4	13.5	-3.09114	97.0045	100 - 11.2 - 1.39 - 0.108	Paeonilactone D	Monoterpene glycosides	Library match
	2.45_199.0970m/z	2.45223	199.097	M-H	183，135	C10H16O4	41.4	13.5	-3.09114	97.0045	100 - 11.2 - 1.39 - 0.108	Paeoveitols A	Others	Library match
27	2.56_496.1577n	2.55623	495.15	M-H, 2M-H	443，285	C23H28O12	43.4	23.1	-0.75442	94.9951	100 - 25.7 - 5.62 - 0.88 - 0.119	Paeonins C	Monoterpene glycosides	Library match
28	2.59_444.1626n	2.59455	489.161	M-H, M+FA-H	392，321，169	C20H28O11	57	91	-1.20682	95.6396	100 - 22.4 - 4.65 - 0.666	2-Methoxy-5-[ (E)-prop-1-enyl]phenolb-vicianoside	Phenols	Library match
29	2.60_357.1184m/z	2.60003	357.118	M+FA-H	321，242，169	C15H20O7	58.7	98	-2.31216	98.0946	100 - 16.7 - 2.75 - 0.304	Paeonoside	Phenols	Library match
30	2.64_577.1342m/z	2.64432	577.134	M-H	483，425，343	C30H26O12	56.2	86	-1.59356	96.6976	100 - 33.2 - 7.8 - 1.37 - 0.201	Procyanidin B-3	Tannis	Library match
	2.64_577.1342m/z	2.64432	577.134	M-H	483，425，343	C30H26O12	56.2	86	-1.59356	96.6976	100 - 33.2 - 7.8 - 1.37 - 0.201	Procyanidin B-7	Tannis	Library match
31	2.71_496.1573n	2.71	495.15	M-H， 2M-H，M+FA-H	431，295，191	C23H28O12	-	-	-0.605877	-	-	Oxypaeoniflorin	Monoterpene glycosides	standard compound
32	2.78_865.1976m/z	2.77568	865.198	M-H	643，495，321，169	C45H38O18	51.7	66.1	-1.10758	93.5152	100 - 49.8 - 15.8 - 3.77 - 0.737 - 0.124	Procyanidin AC-trimer	Tannis	Library match
33	2.81_290.0785n	2.8145	289.071	M-H, 2M-H	245，179，137	C15H14O6	41.8	13.2	-1.7446	97.9894	100 - 16.6 - 2.53 - 0.267	Catechin	Flavanoids	Library match
34	2.85_1153.2616m/z	2.85282	1153.26	M-H	865，579，391	C60H50O24	52.3	71.2	-0.282038	90.7403	100 - 66.4 - 26.6 - 7.92 - 1.92 - 0.397	Arecatanin A-1	Tannis	Library match
35	2.93_457.0770m/z	2.93492	457.077	M-H	377，289，175	C22H18O11	45	36.4	-1.37766	90.2781	100 - 24.4 - 5.11 - 0.763	(-)-Epigallocatechin gallate	Tannis	Library match
36	3.02_184.0369n	3.01752	183.03	M-H, 2M-H	168，139，124	C8H8O5	51.4	58.9	-1.57142	99.8441	100 - 8.94 - 1.38	Me gallate(Gallicin)	Phenols	Library match
37	3.06_785.0831m/z	3.05583	785.083	M-H	729，652，495	C34H26O22	42	15.5	-1.54917	96.4784	100 - 37.9 - 11.5 - 2.55 - 0.485	1-Desgalloyl eugeniin	Tannis	Library match
38	3.08_610.1525n	3.07773	609.145	M-H, 2M-H	541，495	C27H30O16	55.1	81.5	-1.50535	95.8013	100 - 30.2 - 7.68 - 1.4 - 0.222	Quercetin 3-galacto-7-rhamnoside	Flavanoids	Library match
39	3.12_165.0915m/z	3.11605	165.092	M-H	-	C10H14O2	57.2	91.2	-3.60746	98.9783	100 - 11.1 - 0.963	Paeonisuffrone C	Monoterpene glycosides	Library match
40	3.17_373.1496m/z	3.17128	373.15	M+FA-H	-	C16H24O7	46.6	39.9	-2.30495	95.8688	100 - 17.8 - 2.94 - 0.335	(8R)-piperitone-4-en-9-O-β-D-glucopyranoside	Monoterpene glycosides	Library match
41	3.18_327.1441m/z	3.17677	327.144	M-H	265，205，161	C16H24O7	40.6	12.9	-2.46224	93.029	100 - 17.8 - 2.94 - 0.335	(8R)-piperitone-4-en-9-O-β-D-glucopyranoside	Monoterpene glycosides	Library match
42	3.19_640.1630n	3.19318	639.156	M-H, 2M-H	568，491，406，347	C28H32O17	46.5	38.5	-1.45891	95.617	100 - 31.3 - 8.23 - 1.55 - 0.255	Sexangulareinyle 3-O-β-D-sophoroside	Flavanoids	Library match
43	3.22_121.0290m/z	3.21508	121.029	M-H	93	C7H6O2	57.2	94.7	-3.72734	95.381	100 - 7.72 - 0.668	Salicylaldehyde	Phenols	Library match
44	3.26_642.2147n	3.26433	687.213	M-H, M+FA-H	641，459，362	C29H38O16	46.1	34.2	-2.06243	98.7688	100 - 32.4 - 8.37 - 1.58 - 0.255	6'-O-β-D-glucopyranosylalbiflorin	Monoterpene glycosides	Library match
45	3.30_460.1576n	3.30265	505.156	M+FA-H	463，293	C20H28O12	42.4	14.9	-1.00328	98.3896	100 - 22.4 - 4.86 - 0.714	Apiopaeonoside	Tannis	Library match
46	3.39_195.0657m/z	3.39073	195.066	M-H	183，112	C10H12O4	38.3	0	-3.1196	95.3767	100 - 11.1 - 1.38 - 0.108	Paeonilactone C	Monoterpene glycosides	Library match
47	3.42_505.1559m/z	3.4181	505.156	M+FA-H	459，293	C20H28O12	40.8	6	-0.77059	98.8713	100 - 22.4 - 4.86 - 0.714	Apiopaeonoside	Tannis	Library match
48	3.57_460.1575n	3.56638	459.15	M-H	293，233，153	C20H28O12	-	-	0	-	-	Paeonolide	Tannis	standard compound
49	3.63_642.2150n	3.63208	687.213	M-H, M+FA-H	551，459，345	C29H38O16	52.4	67	-1.57706	96.9803	100 - 32.4 - 8.37 - 1.58 - 0.255	β-Gentiobiosylpaeoniflorin	Monoterpene glycosides	Library match
50	3.78_165.0551m/z	3.78037	165.055	M-H	112	C9H10O3	39	0.756	-3.73713	98.8369	100 - 9.96 - 1.06	2,5-Dihydroxy-4-methylacetophenone	Phenols	Library match
51	3.80_343.1389m/z	3.80227	343.139	M-H	307，181	C16H24O8	37.6	0	-2.85645	91.4104	100 - 17.9 - 3.15 - 0.373	Mudanpioside F	Monoterpene glycosides	Library match
52	3.82_329.0871m/z	3.81868	329.087	M-H	322，255，183	C14H18O9	52.7	74	-2.14553	91.9715	100 - 15.7 - 3 - 0.342	Mudanoside A	Phenols	Library match
53	3.84_480.1627n	3.8356	525.161	M-H, M+FA-H, 2M-H	479，435，323	C23H28O11	-	-	0.190418	-	-	albiflorin	Monoterpene glycosides	standard compound
54	4.21_480.1624n	4.20882	525.161	M+FA-H, 2M-H, M-H	479，449	C23H28O11	57.2	92	-1.61841	96.1575	100 - 25.6 - 5.41 - 0.825 - 0.108	Paeoniflorin	Monoterpene glycosides	standard compound
55	4.32_640.1630n	4.32377	639.156	M-H, 2M-H	525，449	C28H32O17	40.2	6.98	-1.41616	95.7525	100 - 31.3 - 8.23 - 1.55 - 0.255	Sexangularetin-3-O-β-D-sophoroside	Flavanoids	Library match
56	4.37_174.0553m/z	4.36805	174.055	M-H	-	C10H9NO2	38.3	0	-4.04223	96.3567	100 - 11.4 - 0.997	5-hydroxy-6-methyl-1H-indole-3-carbaldehyde	Others	Library match
57	4.42_935.0746m/z	4.41732	935.075	M-H	787，525，449	C41H28O26	34.7	1.37	-5.35695	78.4056	100 - 45.7 - 15.5 - 3.92 - 0.837 - 0.154	1-β-O-Galloylpedunculagin	Tannis	Library match
58	4.42_183.1020m/z	4.42278	183.102	M-H	-	C10H16O3	38.6	0	-3.44593	96.8238	100 - 11.1 - 1.18	Paeoveitols B	Others	Library match
59	4.50_181.0499m/z	4.5049	181.05	M+FA-H	-	C8H8O2	38.4	0	-5.38368	98.405	100 - 8.82 - 0.753	p-Hydroxyacetophenone	Phenols	Library match
60	4.56_616.1057n	4.56013	615.098	M-H, 2M-H	-	C28H24O16	49.7	52.3	-1.174	97.8377	100 - 31.2 - 7.98 - 1.48 - 0.236	Quercetin 3-O-(6"galloyl)-β-D-methyl pentose	Flavanoids	Library match
61	4.57_670.1735n	4.57107	669.166	M-H, 2M-H	457，393，241	C29H34O18	41.9	16.4	-1.48916	94.9609	100 - 32.4 - 8.79 - 1.71 - 0.29	Limocitrin-3-O-yl-β-D-sophoroside	Flavanoids	Library match
62	4.64_612.1683n	4.63677	611.161	M-H, 2M-H	523，453，335	C27H32O16	40.1	4.99	-1.19931	97.0218	100 - 30.2 - 7.68 - 1.4 - 0.223	Suffruticoside C	Phenols	Library match
	4.64_612.1683n	4.63677	611.161	M-H, 2M-H	523，453，335	C27H32O16	40.1	4.97	-1.19931	97.0218	100 - 30.2 - 7.68 - 1.4 - 0.223	Suffruticoside A	Phenols	Library match
63	4.66_433.1134m/z	4.66413	433.113	M-H	393，375，260	C21H22O10	39.8	14.7	-1.46349	86.1683	100 - 23.3 - 4.66 - 0.663	Chalcononaringenin 4-O-β-D-methyl pentose	Flavanoids	Library match
64	4.79_647.1609m/z	4.78505	647.161	M-H	-	C30H32O16	40.1	6.64	-1.39636	95.4935	100 - 33.4 - 8.7 - 1.66 - 0.271	Galloyloxypaeoniflorin	Monoterpene glycosides	Library match
65	4.80_442.0892n	4.80147	441.082	M-H, 2M-H	-	C22H18O10	42.7	17.8	-1.79836	97.722	100 - 24.4 - 4.9 - 0.711	Catechin-7-O-gallate	Flavanoids	Library match
66	4.91_609.1452m/z	4.90597	609.145	M-H	525，449，377，335	C27H30O16	-	-	-0.656657	-	-	rutin	Flavanoids	standard compound
67	4.92_510.1730n	4.9224	555.171	M-H, M+FA-H, 2M-H	519，449，335，183	C24H30O12	49.6	51.3	-1.44524	98.6542	100 - 26.8 - 5.91 - 0.942 - 0.129	4-O-methyloxypaeoniflorin	Monoterpene glycosides	Library match
68	5.10_663.1985m/z	5.09805	663.198	M-H	525，449，300	C42H32O8	35.6	1.43	-5.96783	83.2135	100 - 46.1 - 12 - 2.28 - 0.345	Paeoninol	Others	Library match
69	5.11_289.0711m/z	5.109	289.071	M-H	265，197，183	C15H14O6	43.2	25.9	-2.42057	93.1458	100 - 16.6 - 2.53 - 0.267	5-Methyl-4,2',3',5',-tetrahydroxy-4-methoxy-2-aldehyde biphenyl	Others	Library match
70	5.11_442.0891n	5.11448	442.089	M-H, 2M-H	441，335，271	C22H18O10	41.2	14.3	-1.97009	94.174	100 - 24.4 - 4.9 - 0.711	(+)-Catechin-7-O-gallate	Tannis	Library match
71	5.14_937.0942m/z	5.14185	937.094	M-H	763，525，468	C41H30O26	45.7	43.3	-1.16599	86.4255	100 - 45.7 - 15.5 - 3.92 - 0.838 - 0.155	Eugeniin	Tannis	Library match
72	5.24_464.0947n	5.24087	463.087	M-H, 2M-H	335，183	C21H20O12	52.3	67.5	-1.67169	96.285	100 - 23.4 - 5.08 - 0.762 - 0.102	Quercetin 3β-D-galactopyranoside	Flavanoids	Library match
	5.24_464.0947n	5.24087	463.087	M-H, 2M-H	335，183	C21H20O12	52.3	67.5	-1.67169	96.285	100 - 23.4 - 5.08 - 0.762 - 0.102	Quercetin 3β-D-glucopyranoside	Flavanoids	Library match
	5.24_464.0947n	5.24087	463.087	M-H, 2M-H	335，183	C21H20O12	51.8	64.5	-1.67169	96.285	100 - 23.4 - 5.08 - 0.762 - 0.102	Delphinidin 3-hexoside	Flavanoids	Library match
73	5.25_729.1442m/z	5.25182	729.144	M-H	671，525，463，335	C37H30O16	54.3	79.7	-2.67774	95.1207	100 - 41 - 11.5 - 2.41 - 0.419	Procyanidin B-1,3-O-gallate	Tannis	Library match
74	5.35_448.0998n	5.35035	447.092	M-H, 2M-H	393，335，183	C21H20O11	49.5	59.3	-1.7401	90.5425	100 - 23.4 - 4.87 - 0.712	Astragalin	Flavanoids	Library match
	5.35_448.0998n	5.35035	447.092	M-H, 2M-H	375，327，279	C21H20O11	49.2	57.4	-1.7401	90.5425	100 - 23.4 - 4.87 - 0.712	Populnin	Flavanoids	Library match
	5.35_448.0998n	5.35035	447.092	M-H, 2M-H	418，300，221	C21H20O11	49.2	57.4	-1.7401	90.5425	100 - 23.4 - 4.87 - 0.712	Cynaroside	Flavanoids	Library match
75	5.37_611.1612m/z	5.36678	611.161	M-H	525，449，335	C27H32O16	51.7	63.3	-0.978568	96.2538	100 - 30.2 - 7.68 - 1.4 - 0.223	Suffruticoside D	Phenols	Library match
	5.37_611.1612m/z	5.36678	611.161	M-H	525，449，335	C27H32O16	51.6	63.1	-0.978568	96.2538	100 - 30.2 - 7.68 - 1.4 - 0.223	Suffruticoside B	Phenols	Library match
76	5.58_632.1733n	5.58	631.166	M-H, 2M-H	533，469，335，183	C30H32O15	-	-	-0.510484	-	-	Galloylpaeoniflorin	Monoterpene glycosides	standard compound
77	5.69_480.1625n	5.69073	525.161	M+FA-H, 2M-H, M-H	449，335，183	C23H28O11	48.3	44.6	-1.29031	98.3024	100 - 25.6 - 5.41 - 0.825 - 0.108	Mudanpioside I	Monoterpene glycosides	Library match
78	5.86_939.1105m/z	5.86092	939.111	M-H	938，611，469	C41H32O26	-	-	0.106484	-	-	PGG	Tannis	standard compound
79	6.02_1091.1216m/z	6.02017	1091.12	M-H	1090，939，771，545	C48H36O30	57.1	86.9	-0.21615	98.6628	100 - 53.5 - 20.2 - 5.69 - 1.35 - 0.275	6-O-(m-Galloyl)galloyl-1,2,3,4-tetra-O-galloyl-β-D-hexose	Tannis	Library match
80	6.09_465.1034m/z	6.08635	465.103	M-H	-	C21H22O12	48.8	56.7	-1.03088	88.4119	100 - 23.4 - 5.09 - 0.763 - 0.102	Taxifolin-3-O-β-D-glucopyranoside	Flavanoids	Library match
81	6.09_448.0997n	6.09182	447.092	M-H, 2M-H	335，183	C21H20O11	43.5	22.6	-1.91144	97.3712	100 - 23.4 - 4.87 - 0.712	Kaempferol-O-hexoside	Flavanoids	Library match
82	6.10_615.1712m/z	6.0973	615.171	M-H	459，335，183	C30H32O14	50.8	59.3	-1.22941	96.3219	100 - 33.3 - 8.26 - 1.52 - 0.235	Mudanpioside H	Monoterpene glycosides	Library match
83	6.21_495.1499m/z	6.21225	495.15	M-H	-	C23H28O12	37	0	-1.73634	86.8816	100 - 25.7 - 5.62 - 0.88 - 0.119	Salicylpaeoniflorin	Monoterpene glycosides	Library match
	6.21_495.1499m/z	6.21225	495.15	M-H	-	C23H28O12	37	0	-1.73634	86.8816	100 - 25.7 - 5.62 - 0.88 - 0.119	Paeonins C	Monoterpene glycosides	Library match
	6.21_495.1499m/z	6.21225	495.15	M-H	-	C23H28O12	37	0	-1.73634	86.8816	100 - 25.7 - 5.62 - 0.88 - 0.119	paeonirockosides C	Others	Library match
84	6.23_631.1660m/z	6.23415	631.166	M-H	545，469，301	C30H32O15	47.3	41.1	-1.36312	97.1516	100 - 33.4 - 8.48 - 1.59 - 0.253	4-O-Methylgalloylpaeoniflorin	Monoterpene glycosides	Library match
	6.23_631.1660m/z	6.23415	631.166	M-H	545，469	C30H32O15	47.3	41.1	-1.36312	97.1516	100 - 33.4 - 8.48 - 1.59 - 0.253	Galloylpaeoniflorin	Monoterpene glycosides	Library match
	6.23_631.1660m/z	6.23415	631.166	M-H	545，335	C30H32O15	47.3	41.1	-1.36312	97.1516	100 - 33.4 - 8.48 - 1.59 - 0.253	Paeoniside B	Monoterpene glycosides	Library match
	6.23_631.1660m/z	6.23415	631.166	M-H	556，389	C30H32O15	47.4	41.6	-1.36312	97.1516	100 - 33.4 - 8.48 - 1.59 - 0.253	Galloylalbiflorin	Monoterpene glycosides	Library match
	6.23_631.1660m/z	6.23415	631.166	M-H	556，335，249	C30H32O15	47	39.5	-1.36312	97.1516	100 - 33.4 - 8.48 - 1.59 - 0.253	4-O-galloylpaeoniflorin	Monoterpene glycosides	Library match
	6.26_493.1704m/z	6.262	493.17	M-H	469，335	C24H30O11	42	26.6	-2.32198	86.0262	100 - 26.7 - 5.69 - 0.885 - 0.117	4-O-Methylpaeoniflorin	Monoterpene glycosides	Library match
	6.26_493.1704m/z	6.262	493.17	M-H	469，335	C24H30O11	42	26.6	-2.32198	86.0262	100 - 26.7 - 5.69 - 0.885 - 0.117	9-Epi-paeonidanin	Monoterpene glycosides	Library match
85	6.26_493.1704m/z	6.262	493.17	M-H	469，335	C24H30O11	42	26.6	-2.32198	86.0262	100 - 26.7 - 5.69 - 0.885 - 0.117	4-O-Methylalbiflorin	Monoterpene glycosides	Library match
86	6.27_537.1242m/z	6.26748	537.124	M+FA-H	-	C23H24O12	37.9	2.44	-1.54883	88.9977	100 - 25.6 - 5.61 - 0.877 - 0.119	Malvoside	Flavanoids	Library match
87	6.29_448.1000n	6.28937	447.095	M-H	-	C21H20O11	-	-	6.03902	-	-	quercitrin	Flavanoids	standard compound
88	6.33_1091.1218m/z	6.3277	1091.12	M-H	977，863，545，431	C48H36O30	56.8	85.4	-0.04734	98.4518	100 - 53.5 - 20.2 - 5.69 - 1.35 - 0.275	Isomer of 6-O-(m-Galloyl)galloyl-1,2,3,4-tetra-O-galloyl-β-D-hexose	Tannis	Library match
90	6.36_431.0977m/z	6.35507	431.098	M-H	271，195	C21H20O10	45.4	33.1	-1.43794	95.6763	100 - 23.3 - 4.65 - 0.662	Apigenin 7-O-hexoside	Flavanoids	Library match
89	6.36_121.0291m/z	6.35507	121.029	M-H	102，93，71	C7H6O2	-	-	0.826248	-	-	benzoic acid	Phenols	standard compound
91	6.48_537.1970m/z	6.47598	537.197	M+FA-H	-	C25H32O10	40.3	9.52	-1.50071	93.5339	100 - 27.8 - 5.77 - 0.888 - 0.115	Paeonidanin	Monoterpene glycosides	Library match
92	6.48_301.1075m/z	6.47598	301.108	M-H	255，183，146	C17H18O5	56.8	93.7	-2.08588	92.8722	100 - 18.8 - 2.69 - 0.285	Paeonilactone B	Monoterpene glycosides	Library match
93	6.52_783.1767m/z	6.51978	783.177	M-H	675，545，469	C37H36O19	55.5	84.5	-1.39505	94.8293	100 - 41.2 - 12.2 - 2.68 - 0.496	3',6'-di-O-Galloylpaeoniflorin	Monoterpene glycosides	Library match
94	6.83_447.0926m/z	6.83278	447.093	M-H	417，335，244	C21H20O11	57.5	93.7	-1.59783	95.6336	100 - 23.4 - 4.87 - 0.712	Luteolin 7-hexoside	Flavanoids	Library match
95	6.84_287.0556m/z	6.84373	287.056	M-H	259	C15H12O6	49	50.3	-1.6105	96.7711	100 - 16.6 - 2.52 - 0.266	Dihydrokaempferol	Flavanoids	Library match
96	6.89_479.1551m/z	6.88752	479.155	M+FA-H	447，357，243	C22H26O9	45.2	32.2	-1.72753	95.8084	100 - 24.4 - 4.71 - 0.664	Lactiflorin	Monoterpene glycosides	Library match
97	6.96_435.1290m/z	6.95918	435.129	M+FA-H	315，273	C20H22O8	41.7	13.5	-1.84217	97.0522	100 - 22.2 - 3.99 - 0.521	Polydatin	Others	Library match
98	6.96_273.0762m/z	6.95918	273.076	M+FA-H	241，173	C14H12O3	38.4	2.2	-2.64392	93.1461	100 - 15.4 - 1.72 - 0.143	Resveratrol (Z)-form	Stilbenes	Library match
99	7.28_510.1728n	7.27718	509.166	M-H, M+FA-H	451，335	C24H30O12	41.6	22.2	-1.75557	88.1031	100 - 26.8 - 5.91 - 0.942 - 0.129	Mudanpioside D (4''-Methoxy-paeoniflorin)	Monoterpene glycosides	Library match
100	7.39_464.1675n	7.39263	463.16	M-H, M+FA-H	-	C23H28O10	40.9	11.2	-1.67791	95.1673	100 - 25.6 - 5.19 - 0.77	Paeobrin	Monoterpene glycosides	Library match
101	7.65_273.0758m/z	7.6509	273.076	M-H	-	C14H12O3	-	-	-1.83099	-	-	Resveratrol (E)-form	Stilbenes	standard compound
102	7.69_680.2033n	7.6947	679.196	M-H, 2M-H	573，445，349	C42H32O9	-	-	-1.32509	-	-	suffruticosol A	Stilbenes	standard compound
103	7.84_600.1837n	7.83752	599.176	M-H, 2M-H	491，445，349	C30H32O13	-	-	-0.166896	-	-	Mudanpioside C	Monoterpene glycosides	standard compound
104	8.00_525.1607m/z	8.00222	525.161	M+FA-H	493，419，283	C23H28O11	52.4	65.8	-1.43845	97.7921	100 - 25.6 - 5.41 - 0.825 - 0.108	Floralalbiflorin I	Monoterpene glycosides	Library match
105	8.40_600.1835n	8.4028	599.176	M-H, M+FA-H, 2M-H	505，445，325	C30H32O13	-	-	-0.500687	-	-	Benzoyl oxypaeoniflorin	Monoterpene glycosides	standard compound
106	8.44_287.0556m/z	8.44112	287.056	M-H	220，183	C15H12O6	38.8	0	-1.65987	96.0866	100 - 16.6 - 2.52 - 0.266	Dihydrokaempferol	Flavanoids	Library match
107	8.53_680.2035n	8.5292	725.202	M+FA-H, 2M-H, M-H	679，585，453	C42H32O9	51.2	64	-1.61565	93.7347	100 - 46.1 - 12.2 - 2.38 - 0.371	Ampelopsin E	Stilbenes	Library match
	8.53_680.2035n	8.5292	725.202	M+FA-H, 2M-H, M-H	679，585，453	C42H32O9	51.5	65.9	-1.61565	93.7347	100 - 46.1 - 12.2 - 2.38 - 0.371	Ampelopsin E	Stilbenes	Library match
	8.55_746.2412n	8.54562	791.239	M+FA-H, 2M-H, M-H	745，599，445	C36H42O17	48.6	47.7	-1.27982	96.7394	100 - 40.1 - 11.3 - 2.39 - 0.421	Suffuruyabiosides B	Monoterpene glycosides	Library match
108	8.55_746.2412n	8.54562	791.239	M+FA-H, 2M-H, M-H	667，545，435	C36H42O17	48	44.6	-1.27982	96.7394	100 - 40.1 - 11.3 - 2.39 - 0.421	Paeoniflorin B	Monoterpene glycosides	Library match
109	8.59_183.1021m/z	8.58942	183.102	M-H	-	C10H16O3	44.1	28.1	-3.1041	96.0286	100 - 11.1 - 1.18	Euglobal	Phenols	Library match
110	8.72_630.1940n	8.72128	629.187	M-H, 2M-H, M+FA-H	505，447，285	C31H34O14	42.1	13.8	-1.32534	98.0984	100 - 34.5 - 8.63 - 1.61 - 0.252	3''-Methoxy-4''-hydroxy-6'-benzoyl-paeoniflorin	Monoterpene glycosides	Library match
111	8.72_286.0472n	8.72128	285.04	M-H, 2M-H	245，174，112	C15H10O6	40.7	8.02	-1.90008	97.5505	100 - 16.6 - 2.52 - 0.266	Luteolin	Flavanoids	Library match
112	8.79_302.0420n	8.79245	301.035	M-H, 2M-H	285，183	C15H10O7	53.2	71.6	-2.02835	96.7187	100 - 16.6 - 2.73 - 0.301	Quercetin	Flavanoids	standard compound
	8.79_302.0420n	8.79245	301.035	M-H, 2M-H	242，174	C15H10O7	53.2	71.6	-2.02835	96.7187	100 - 16.6 - 2.73 - 0.301	Herbacetin (8-Hydroxykaempferol)	Flavanoids	Library match
113	8.95_375.1290m/z	8.94622	375.129	M-H	-	C16H24O10	53	76.8	-1.79589	90.1606	100 - 18 - 3.57 - 0.449	4-O-Methyldebenzoylpaeoniflorin	Monoterpene glycosides	Library match
114	8.95_680.2035n	8.95168	679.196	M-H	601，469	C42H32O9	-	-	-0.883396	-	-	suffruticosol B	Stilbenes	standard compound
115	9.20_645.1815m/z	9.20447	645.182	M-H	599，447	C31H34O15	39.3	13.4	-1.4845	84.6136	100 - 34.5 - 8.85 - 1.68 - 0.27	6-O-Vanillyoxypaeoniflorin	Monoterpene glycosides	Library match
	9.20_645.1815m/z	9.20447	645.182	M+FA-H	629，599，493	C30H32O13	39.5	13.4	-1.59829	85.9598	100 - 33.3 - 8.04 - 1.45 - 0.218	Paeonidanin B	Monoterpene glycosides	Library match
	9.20_645.1815m/z	9.20447	645.182	M+FA-H	515，373	C30H32O13	39.5	13.4	-1.59829	85.9598	100 - 33.3 - 8.04 - 1.45 - 0.218	4''-Hydroxy-6'-O-benzoyl-9-[(Benzoyloxy)methyl]-1-(β-D-glucopyranosyloxy)-4-hydroxy-6-methyl-7-oxatricyclo[4.3.0.03,9]nonan-8-one	Monoterpene glycosides	Library match
116	9.24_177.0550m/z	9.2428	177.055	M-H	146，121	C10H10O3	53.2	72.1	-3.7529	98.0872	100 - 11 - 1.17	Paeoveitols D	Others	Library match
117	9.43_680.2030n	9.43488	679.196	M-H, M+FA-H, 2M-H	677，529，453	C42H32O9	-	-	-1.61956	-	-	suffruticosol C	Stilbenes	standard compound
118	10.07_551.2128m/z	10.0718	551.213	M-H	435，343，174	C27H36O12	39	0	-1.04291	96.0245	100 - 30.1 - 6.83 - 1.15 - 0.163	9-O-butyloxypaeonidanin	Monoterpene glycosides	Library match
	10.07_551.2128m/z	10.0718	551.213	M-H	435，343，174	C27H36O12	39	0	-1.04291	96.0245	100 - 30.1 - 6.83 - 1.15 - 0.163	4-O-butyloxypaeoniflorin	Monoterpene glycosides	Library match
119	10.21_505.2072m/z	10.2087	505.207	M-H	469，343，174	C26H34O10	52.3	71.9	-1.38652	91.3772	100 - 28.9 - 6.08 - 0.952 - 0.125	Benzofuran neoligans	Others	Library match
120	10.32_454.1408n	10.3241	453.134	M-H, M+FA-H, 2M-H	311，271，183	C28H22O6	-	-	-0.441371	-	-	cis-viniferin	Stilbenes	standard compound
121	10.38_584.1885n	10.38	584.188	M+FA-H, 2M-H, M-H	553，453，399，269	C30H32O12	56.2	86.6	-1.53373	96.3123	100 - 33.3 - 7.83 - 1.38 - 0.202	Benzoylwurdin	Monoterpene glycosides	Library match
122	10.39_269.0449m/z	10.3898	269.045	M-H	230，196，149	C15H10O5	43.1	20.7	-2.26148	97.3745	100 - 16.5 - 2.31 - 0.231	Apigenin	Flavanoids	Library match
123	10.51_349.1860m/z	10.5107	349.186	M-H	321，269，174	C16H30O8	51.5	66	-2.1787	94.2818	100 - 18 - 3.16 - 0.375	Sachaloside	Others	Library match
124	10.55_643.2023m/z	10.5491	643.202	M+FA-H	629，583，469	C31H34O12	36.5	0	-1.58013	84.6124	100 - 34.4 - 8.19 - 1.46 - 0.217	Suffrupaeonidanin D	Monoterpene glycosides	Library match
	10.55_643.2023m/z	10.5491	643.202	M+FA-H	630，553，449	C31H34O12	36.5	0	-1.58013	84.6124	100 - 34.4 - 8.19 - 1.46 - 0.217	Paeonidanin A	Monoterpene glycosides	Library match
125	10.60_747.1832m/z	10.6043	747.183	M+FA-H	679，453，361	C33H34O17	53.3	82.4	7.71938	92.8145	100 - 36.7 - 10 - 2.04 - 0.349	Paenoside A	Phenols	Library match
126	10.60_679.1960m/z	10.6043	679.196	M-H	529，361	C42H32O9	-	-	-1.17786	-	-	cis-suffruticosol D	Stilbenes	standard compound
127	10.66_673.2128m/z	10.6591	673.213	M+FA-H	-	C32H36O13	53.8	95.4	-1.57462	75.237	100 - 35.5 - 8.79 - 1.63 - 0.251	Suffrupaeonidanin F	Monoterpene glycosides	Library match
	10.66_673.2128m/z	10.6591	673.213	M+FA-H	-	C32H36O13	53.8	95.4	-1.57462	75.237	100 - 35.5 - 8.79 - 1.63 - 0.251	Suffrupaeonidanin E	Monoterpene glycosides	Library match
128	10.67_629.1867m/z	10.67	629.187	M-H	519，453	C31H34O14	58	93.1	-1.35105	98.721	100 - 34.5 - 8.63 - 1.61 - 0.252	6'-O-Benzoyl-4"-hydroxy-3"-methoxypaeoniflorin	Monoterpene glycosides	Library match
	10.67_629.1867m/z	10.67	629.187	M-H	565，421	C31H34O14	58.1	93.3	-1.35105	98.721	100 - 34.5 - 8.63 - 1.61 - 0.252	6'-O-Vanillylpaeoniflorin	Monoterpene glycosides	Library match
	10.67_629.1867m/z	10.67	629.187	M-H	519，453，387	C31H34O14	58.1	93.3	-1.35105	98.721	100 - 34.5 - 8.63 - 1.61 - 0.252	Mudanpioside B	Monoterpene glycosides	Library match
	10.67_629.1867m/z	10.67	629.187	M-H	519，453，387	C31H34O14	58.1	93.3	-1.35105	98.721	100 - 34.5 - 8.63 - 1.61 - 0.252	Mudanpioside J	Monoterpene glycosides	Library match
	10.67_629.1867m/z	10.67	629.187	M+FA-H	521，348	C30H32O12	58.4	95.5	-1.45745	98.3739	100 - 33.3 - 7.83 - 1.38 - 0.202	Paeonivayin	Monoterpene glycosides	Library match
	10.67_629.1867m/z	10.67	629.187	M+FA-H	565，421	C30H32O12	58.5	96.1	-1.45745	98.3739	100 - 33.3 - 7.83 - 1.38 - 0.202	4-O-Methylbenzoylpaeoniflorin	Monoterpene glycosides	Library match
	10.67_629.1867m/z	10.67	629.187	M+FA-H	453，333	C30H32O12	58.5	96.1	-1.45745	98.3739	100 - 33.3 - 7.83 - 1.38 - 0.202	Paeoniside A	Monoterpene glycosides	Library match
	10.67_629.1867m/z	10.67	629.187	M+FA-H, 2M-H, M-H	583，479	C30H32O12	58.7	96.8	-1.45745	98.3739	100 - 33.3 - 7.83 - 1.38 - 0.202	Paeonidaninols B	Monoterpene glycosides	Library match
	10.67_629.1867m/z	10.67	629.187	M-H	553，431，273	C31H34O14	58	93.1	-1.35105	98.721	100 - 34.5 - 8.63 - 1.61 - 0.252	3''-Methoxy-4''-hydroxy-6'-benzoyl-paeoniflorin	Monoterpene glycosides	Library match
129	10.69_614.1994n	10.6919	659.197	M-H, M+FA-H	629，553，341	C31H34O13	39.3	0	-0.886211	97.7003	100 - 34.4 - 8.41 - 1.54 - 0.234	4-O-methylbenzoyloxypaeoniflorin	Monoterpene glycosides	Library match
130	10.74_679.1958m/z	10.7357	679.196	M-H, M+FA-H, 2M-H	629，599，391	C42H32O9	-	-	-1.47233	-	-	cis-gnetin H	Stilbenes	standard compound
131	10.74_285.0398m/z	10.7357	285.04	M-H	242，174，146	C15H10O6	-	-	-0.350828	-	-	Kaempferol	Flavanoids	standard compound
132	10.77_315.0503m/z	10.769	315.05	M-H	-	C16H12O7	57.7	97.8	-2.4408	93.6627	100 - 17.7 - 2.91 - 0.331	Sexangularetin	Flavanoids	Library match
	10.77_315.0503m/z	10.769	315.05	M-H	-	C16H12O7	57.7	97.8	-2.4408	93.6627	100 - 17.7 - 2.91 - 0.331	Isorhamnetin	Flavanoids	Library match
	10.90_299.0555m/z	10.9004	299.056	M-H	195，177，121	C16H12O6	58.3	96.9	-1.93196	96.8128	100 - 17.7 - 2.7 - 0.294	Peonidin	Flavanoids	Library match
133	10.90_299.0555m/z	10.9004	299.056	M+FA-H	254，177	C15H10O4	53.2	71	-2.2818	97.8009	100 - 16.5 - 2.09 - 0.196	1,5-Dihydroxy-3-methyl-anthraquinone	Others	Library match
134	11.06_677.1806m/z	11.0596	677.181	M+FA-H	583，449，323，257	C30H32O15	49.8	75.7	13.0629	87.1704	100 - 33.4 - 8.48 - 1.59 - 0.253	4-O-galloylalbiflorin	Monoterpene glycosides	Library match
135	11.19_680.2035n	11.186	679.196	M-H, M+FA-H	607，513，385	C42H32O9	-	-	-0.736164	-	-	trans-suffruticosol D	Stilbenes	standard compound
136	11.22_650.4018n	11.2189	695.4	M+FA-H, 2M-H, M-H	513，315	C36H58O10	51.6	62	-1.81395	98.4561	100 - 40 - 9.84 - 1.8 - 0.269	2α,3β,23-Trihydroxy-12-oleanen-28-oic acid-β-D-glucopyranosyl ester	Terpenoids and Steroids	Library match
137	11.23_454.1412n	11.2299	453.134	M-H, M+FA-H, 2M-H	285	C28H22O6	-	-	-0.220685	-	-	trans-viniferin	Stilbenes	standard compound
138	11.60_165.0551m/z	11.6031	165.055	M-H	150，112	C9H10O3	-	-	-0.605858	-	-	paeonol	Phenols	standard compound
139	11.83_679.1963m/z	11.8285	679.196	M-H	511，329	C42H32O9	-	-	-0.736164	-	-	tran-gnetin H	Stilbenes	standard compound
141	11.88_725.2017m/z	11.8832	725.202	M+FA-H	679，552，480	C42H32O9	47.9	42	-1.65423	99.2975	100 - 46.1 - 12.2 - 2.38 - 0.371	Rockiiol C	Stilbenes	Library match
140	11.88_583.1814m/z	11.8832	583.181	M-H	553，329	C30H32O12	-	-	-0.342946	-	-	Benzoylpaeoniflorin	Monoterpene glycosides	standard compound
142	12.23_287.2221m/z	12.2291	287.222	M+FA-H	183，112	C15H30O2	50.3	56.7	-2.61977	98.1003	100 - 16.6 - 1.71 - 0.131	13-Methyltetradecanoic acid	Others	Library match
143	12.28_517.3165m/z	12.2783	517.316	M-H	-	C30H46O7	41.1	8.99	-1.11725	97.8914	100 - 33.2 - 6.79 - 1.03 - 0.127	1β,3β, 5α-23,24-Pentahydroxy-30-norolean-12,20(29)-dien-28-oic acid	Terpenoids and Steroids	Library match
144	12.68_358.2137n	12.6794	357.206	M-H, 2M-H	325，292，183	C22H30O4	46.8	39.7	-2.01822	96.5298	100 - 24.3 - 3.64 - 0.408	Palbinone	Terpenoids and Steroids	Library match
145	13.63_535.3269m/z	13.629	535.327	M+FA-H	-	C29H46O6	39.2	0	-1.44139	97.7086	100 - 32.1 - 6.22 - 0.895 - 0.104	Paeonenoides D	Terpenoids and Steroids	Library match
	13.63_535.3269m/z	13.629	535.327	M+FA-H	-	C29H46O6	39.2	0	-1.44139	97.7086	100 - 32.1 - 6.22 - 0.895 - 0.104	11α,12α-epoxy-3β,4β-dihydroxy-24-nor-olean-28-oic acid	Terpenoids and Steroids	Library match
146	14.07_555.3298m/z	14.0739	555.33	M+FA-H	487，433，371	C32H46O5	39	18.7	-5.70448	82.761	100 - 35.3 - 7.08 - 1.03 - 0.12	(3β,4α,11α,12α,13β)-11,12-Epoxy-13-hydroxy-3,23-(isopropylidenedioxy)-30-norolean-20(29)-en-28-oic acid 28,13-lactone	Terpenoids and Steroids	Library match
	14.15_471.2726m/z	14.1451	471.273	M-H	433，311	C28H40O6	51.5	68.1	-5.56127	95.5187	100 - 31 - 5.87 - 0.827	Paeonenoide A	Terpenoids and Steroids	Library match
148	14.15_471.2726m/z	14.1451	471.273	M-H	457，363，311	C28H40O6	51.5	68.1	-5.56127	95.5187	100 - 31 - 5.87 - 0.827	6α,7α-epoxy-1α,3β,4β,13β-tetrahydroxy-24,30-dinor-olean-20-ene-28,13b-olide	Terpenoids and Steroids	Library match
147	14.15_457.2950m/z	14.1451	457.295	M-H	449，363，311	C28H42O5	37.7	0	-2.16336	90.9654	100 - 31 - 5.66 - 0.763	3β,4β-23-Trihydroxy-24,30-dinorolean-12,20(29)-dien-28-oic acid	Terpenoids and Steroids	Library match
149	14.24_486.3338n	14.2386	485.326	M-H, M+FA-H	449，433，311	C30H46O5	55.8	87.7	-1.54466	93.4024	100 - 33.2 - 6.35 - 0.892 - 0.1	11α,12α-Epoxy-3β,23-dihydroxyolean 28,13β-olide	Terpenoids and Steroids	Library match
150	14.44_515.3011m/z	14.4417	515.301	M+FA-H	433，339，309	C29H42O5	39.3	0	-0.612002	97.1942	100 - 32 - 5.99 - 0.824	11α,12α-Epoxy-3β,23-dihydroxy-30-norolean-20(29)-en-28,13β-olide	Terpenoids and Steroids	Library match
151	14.66_441.3005m/z	14.6557	441.3	M-H, M+FA-H	336，293，183	C28H42O4	52.6	75.5	-1.27396	88.8729	100 - 30.9 - 5.44 - 0.697	Paeonenoide C	Terpenoids and Steroids	Library match
152	14.82_455.2798m/z	14.8204	455.28	M-H	433，311	C28H40O5	54.6	85.6	-1.14241	88.7256	100 - 30.9 - 5.65 - 0.761	11α,12α-epoxy-3β,4β,13β-trihydroxy-24,30-dinor-olean-20(29)-en-28,13β-olide, or 23-deoxypaeonenoide A	Terpenoids and Steroids	Library match
153	14.89_487.3417m/z	14.8861	487.342	M-H	449，339	C30H48O5	38	0	-2.41423	92.8945	100 - 33.2 - 6.36 - 0.893 - 0.1	emodinol	Others	Library match
154	15.19_315.2535m/z	15.1881	315.253	M+FA-H	293，254	C17H34O2	38	0	-2.19708	92.8557	100 - 18.9 - 2.09 - 0.171	Margaric acid	Others	Library match
155	15.66_470.3388n	15.6603	469.332	M-H, 2M-H	449，296	C30H46O4	44.4	26.3	-1.70137	97.7917	100 - 33.1 - 6.13 - 0.821	3β,23-Dihydroxy-oleana-11,13(18)-dien-28-oic acid	Terpenoids and Steroids	Library match
	15.66_470.3388n	15.6603	469.332	M-H, 2M-H	416，348	C30H46O4	44.4	26	-1.70137	97.7917	100 - 33.1 - 6.13 - 0.821	3β-Hydroxy-11-oxo-olean-12-en-28-oic acid	Terpenoids and Steroids	Library match
	15.66_470.3388n	15.6603	469.332	M-H, 2M-H	441，265	C30H46O4	44.4	26	-1.70137	97.7917	100 - 33.1 - 6.13 - 0.821	11α,12α-Epoxy-3β-hydroxy-28,13β-olide	Terpenoids and Steroids	Library match
	15.80_471.3465m/z	15.7977	471.346	M-H	409，320，293	C30H48O4	46.5	45	-3.19013	91.3718	100 - 33.2 - 6.14 - 0.823	Oplopanaxogenin C	Terpenoids and Steroids	Library match
	15.80_471.3465m/z	15.7977	471.346	M-H	447，348，265	C30H48O4	46.6	45.5	-3.19013	91.3718	100 - 33.2 - 6.14 - 0.823	2α,3β-Dihydroxy-oleana-12-en-28-oic acid	Terpenoids and Steroids	Library match
	15.80_471.3465m/z	15.7977	471.346	M-H	431，378，257	C30H48O4	46.6	45.5	-3.19013	91.3718	100 - 33.2 - 6.14 - 0.823	3β,4β,23-trihydroxy-24-nor-olean-12-en-28-oic acid	Terpenoids and Steroids	Library match
156	15.80_471.3465m/z	15.7977	471.346	M-H	431，297，194	C30H48O4	46.5	45	-3.19013	91.3718	100 - 33.2 - 6.14 - 0.823	23-Hydroxybetulinic acid	Terpenoids and Steroids	Library match
157	15.80_469.3316m/z	15.7977	469.332	M-H	441，293	C30H46O4	57.6	97.9	-1.66012	92.227	100 - 33.1 - 6.13 - 0.821	3β-Hydroxy-11-oxo-olean-12-en-28-oic acid	Terpenoids and Steroids	Library match
	15.80_469.3316m/z	15.7977	469.332	M-H	407，385	C30H46O4	57.8	99	-1.66012	92.227	100 - 33.1 - 6.13 - 0.821	3β,23-Dihydroxy-oleana-11,13(18)-dien-28-oic acid	Terpenoids and Steroids	Library match
158	15.92_455.3153m/z	15.9181	455.315	M-H	409，297	C29H44O4	37.6	0	-3.02721	91.4519	100 - 32 - 5.78 - 0.757	3β,23-dihydroxy-30-nor-olean-12,20-dien-28-oic acid	Terpenoids and Steroids	Library match
	15.92_455.3153m/z	15.9181	455.315	M-H	431，409，283	C29H44O4	37.6	0	-3.02721	91.4519	100 - 32 - 5.78 - 0.757	30-Norhederagenin	Terpenoids and Steroids	Library match
159	16.31_472.3544n	16.3082	471.347	M-H, 2M-H	449，316	C30H48O4	38.9	0	-1.7545	96.7916	100 - 33.2 - 6.14 - 0.823	Hederagenin	Terpenoids and Steroids	Library match
160	16.95_456.3596n	16.9502	455.352	M-H, 2M-H	330，216	C30H48O3	38.3	0	-1.6451	93.4476	100 - 33.1 - 5.92 - 0.752	Betulinic acid	Terpenoids and Steroids	Library match
	16.95_456.3596n	16.9502	455.352	M-H, 2M-H	425，312	C30H48O3	38.3	0	-1.6451	93.4476	100 - 33.1 - 5.92 - 0.752	Oleanolic acid	Terpenoids and Steroids	Library match
